# Supplementary material for: Dry Heating of Cowpea Flour below Biopolymer Melting Temperatures Improves the Physical Properties of Bread Made from Climate-Resilient Crops
Source: MDPI journal article supplement (doi:10.3390/foods11111554), 2022-05-25
Supplement: s1 [file s1]

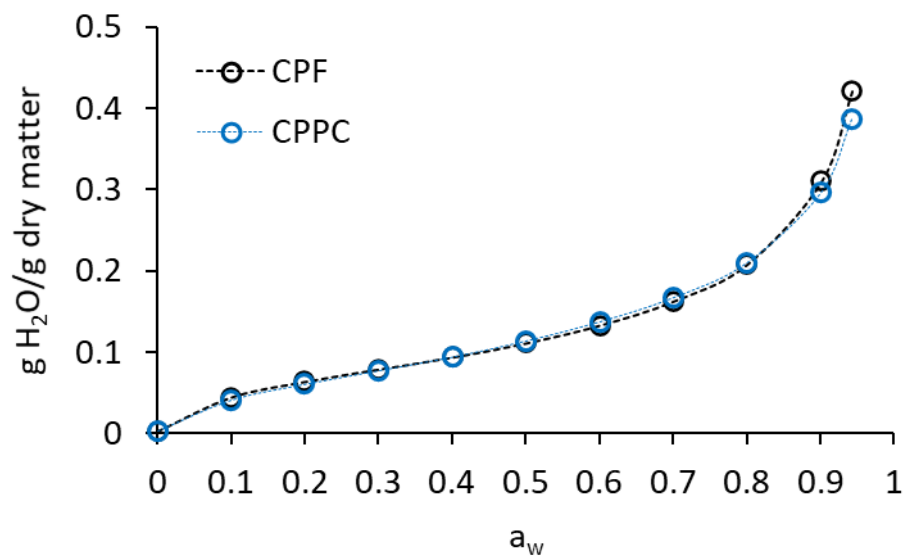

Figure S1. Sorption isotherm of CPF and CPPC.

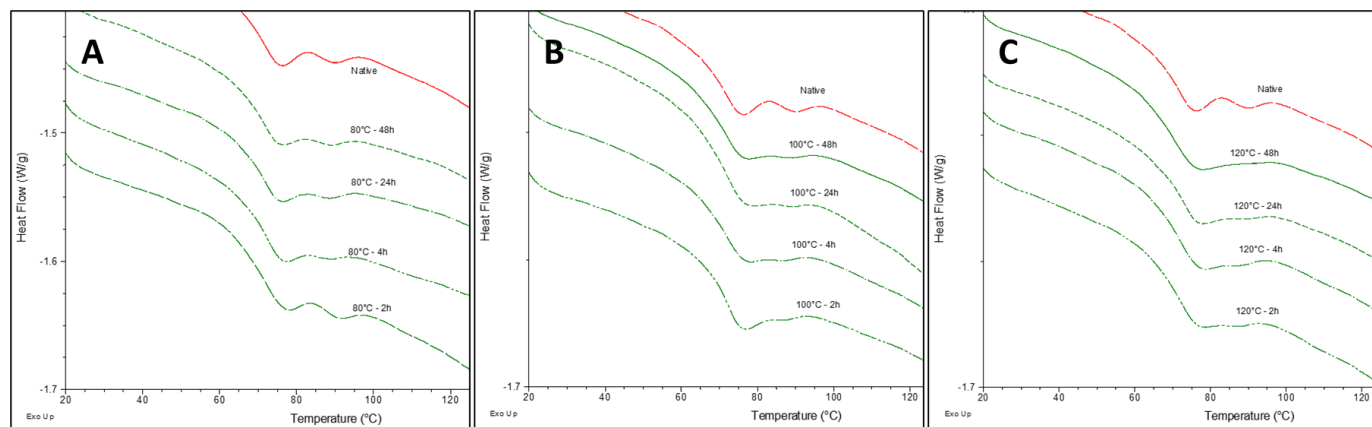

Figure S2. DSC thermograms for dry-heating of CPF at 80 °C (A), 100 °C (B) and 120 °C (C). Native CPF is shown in each graph by the red line. Dry-heating time (green lines) from 2 h to 48 h (from bottom to top).

**Table S1.** Melting temperatures and enthalpies of transitions for native and dry-heated CPF.  $T_{\text{peak},1}$  is associated to starch gelatinization and  $T_{\text{peak},2}$  to protein denaturation.

| <b>Samples</b>  | <b>Enthalpy (J/g)</b> | <b><math>T_{\text{onset}}</math> (°C)</b> | <b><math>T_{\text{peak},1}</math> (°C)</b> | <b><math>T_{\text{peak},2}</math> (°C)</b> |
|-----------------|-----------------------|-------------------------------------------|--------------------------------------------|--------------------------------------------|
| <b>Native</b>   | $8.7^{ab} \pm 0.2$    | $64.6^{ab} \pm 0.9$                       | $75.7^{ab} \pm 0.2$                        | $89.5^c \pm 0.6$                           |
| <b>80C-2h</b>   | $10.1^{abc} \pm 0.8$  | $64.1^{ab} \pm 1.2$                       | $76.7^{cd} \pm 0.4$                        | $89.4^c \pm 1.3$                           |
| <b>80C-4h</b>   | $9.0^{ab} \pm 0.2$    | $65.7^b \pm 0.4$                          | $76.3^{abcd} \pm 0.2$                      | $88.5^{abc} \pm 1.0$                       |
| <b>80C-24h</b>  | $10.5^{bc} \pm 1.2$   | $64.7^{ab} \pm 1.3$                       | $75.5^a \pm 0.1$                           | $89.1^{bc} \pm 1.6$                        |
| <b>80C-48h</b>  | $8.9^{ab} \pm 0.5$    | $65.0^{ab} \pm 0.3$                       | $75.5^a \pm 0.1$                           | $87.6^{abc} \pm 1.1$                       |
| <b>100C-2h</b>  | $9.5^{abc} \pm 0.7$   | $64.1^{ab} \pm 1.2$                       | $76.0^{abc} \pm 0.1$                       | $87.7^{abc} \pm 0.9$                       |
| <b>100C-4h</b>  | $8.8^{ab} \pm 0.4$    | $65.7^b \pm 0.4$                          | $76.5^{bcd} \pm 0.2$                       | $86.8^{abc} \pm 0.2$                       |
| <b>100C-24h</b> | $9.8^{abc} \pm 0.7$   | $64.7^{ab} \pm 1.3$                       | $76.6^{cd} \pm 0.2$                        | $87.7^{abc} \pm 0.7$                       |
| <b>100C-48h</b> | $11.0^c \pm 1.0$      | $65.0^{ab} \pm 0.3$                       | $76.6^{bcd} \pm 0.4$                       | -                                          |
| <b>120C-2h</b>  | $8.4^a \pm 0.2$       | $65.3^{ab} \pm 0.3$                       | $76.6^{cd} \pm 0.6$                        | $86.1^a \pm 0.3$                           |
| <b>120C-4h</b>  | $9.1^{abc} \pm 0.3$   | $64.7^{ab} \pm 0.5$                       | $77.2^d \pm 0.2$                           | $86.6^{ab} \pm 0.8$                        |
| <b>120C-24h</b> | $9.7^{abc} \pm 1.1$   | $63.9^{ab} \pm 1.7$                       | $76.3^{abcd} \pm 0.5$                      | -                                          |
| <b>120C-48h</b> | $11.0^c \pm 0.5$      | $62.5^a \pm 1.0$                          | $76.3^{abcd} \pm 0.5$                      | -                                          |
